le moment, mérite bien d'être reproduit ici non seulement en raison des renseignements qu'il fournit déjà mais aussi parce qu'il nous permet d'espérer d'autres succès futurs, plus intéressants encore.

Après une brève description des lieux de pêche déjà indiqués, l'auteur donne le résultat du dépouillement des feuilles de pêche qu'il a obtenu des capitaines de chalutiers français, sous la forme de cartogrammes bi-mensuels (moyennes de 10 ans, 1921 à 1930) et quelques autres graphiques des variations du rendement de la pêche du merlu dans différents lieux, ayant garde à la profondeur travaillée. Les renseignements ainsi réunis et présentés, offrent un intérêt remarquable.

Les migrations du merlu, c'est le titre du chapitre de cet étude de M. Belloc. Ici, en raison de la grandeur du problème et de l'insuffisance des données actuelles, le champ des hypothèses est largement ouvert. Notons, tout d'abord, un point de terminologie: M. Belloc réserve le nom de "migrations" aux "mouvements saisonniers d'assez grande amplitude" et celui de "déplacements" à "ceux de faible amplitude portant sur une période beaucoup plus courte, par exemple, les changements de niveau au cours d'une même journée." Il ajoute: "les migrations sont naturelles, elles obéissent à un rythme biologique. Les déplacements, qui se superposent aux migrations, sont accidentels." Comme exemple de déplacements, dans ce sens, l'auteur signale celui provoqué, selon lui, par le soulèvement de "denses nuages de vase (par les chaluts trainés sur le fond), créant ainsi un milieu moins respirable pour le poisson." "Ce déplacement en altitude peut être de faible amplitude (quelques mètres, juste un peu plus que la hauteur à laquelle la corde du dos du chalut est entraînée) et donner cependant l'impression qu'il n'y a plus de poissons." Cette hypothèse est étayée: 1) des constatations faites sur le rendement de la pêche d'un chalutier travaillant d'abord sur un certain lieu et, ensuite, après l'arrivée d'un grand nombre d'autres chalutiers qui pêchèrent ensemble; 2) des observations sur le sédiment extrait par le lavage des branchies de merlus capturés dans les deux cas précédents. L'auteur se propose de poursuivre ces recherches qui, en effet, méritent une étude approfondie en raison de son application à la pratique de la pêche.

Des migrations proprement dites, l'article ne s'occupe que de celles des jeunes merlus. Signalons, à ce sujet, les moyennes de la longueur totale des merlus capturés à des profondeurs de plus en plus grandes, au large de la côte française du Golfe de Gascogne (12 cm. par 70—80 m.; 19 cm. par 100—120 m. et 21 cm. par 150—170 m.). Du rôle de la densité (au sens physique du terme) du merlu dans les migrations, hypothèse suggérée par l'auteur sous certaines réserves, très approuvables évidemment, il nous faut attendre des faits plus clairs et démonstratifs; la question est tout simplement amorcée dans ce travail.

L'auteur annonce, pour une quatrième partie, l'exposition de ses recherches sur les migrations du merlu adulte (de *concentration* et de *dispersion*), leurs facteurs déterminants, la reproduction et la nourriture de ce poisson.

A. Ramalho.

**H. Blegvad.** "Transplantations of Plaice from the North Sea to the Belt Sea, 1928—1933. The Scientific Survey." Rep. Danish Biol. Stat., Vol. XXXIX, 1934, pp. 11—84, 43 Fig. Copenhagen, 1935.

The Fisheries Inspectorate of Denmark acting in collaboration with the scientific staff of the Danish Biological Station have been, since 1928, transplanting about a million plaice a year from the crowded nursery

grounds of the North Sea to the underpopulated Danish waters of the Belt Seas. The work has been financed in the main by the Danish government and it has been an undoubted commercial success. The Danish fishermen have profited to the extent of 168,000 kr. (over £ 8,000) a year, or, taking the cost of transplantations and of the scientific supervision into account, an annual profit of over 200 per cent. is shown. These are the minimum figures, as Dr. Blegvad in his admirable report has purposely underestimated the profits.

The great interest of the report lies in the application of scientific methods to a commercial undertaking and also it shows the practicability of extending this profitable fish-farming to other areas.

Each transplantation has been carefully watched. Many thousands of fish have been marked and thousands of age determinations, measurements, etc. have been made both of the transplanted plaice and of the local stocks in the Belt Seas. The estimation of the growth-rates of the two races brings out the interesting fact that the transplanted fish increase in size more rapidly than the local fish. The former growing 12 cm. and the latter 8 cm. in the first year after marking. Dr. Blegvad attributes this to the "higher potential growth energy" of North Sea plaice. The carefully analysed growth-rate of each year's transplantation has enabled the observers to find out the most profitable size at which to transplant the fish, which is evidently about 21 cm. Plaice much below this size have less vitality and do not stand the handling and transport so satisfactorily.

Inevitably during the course of the work the supervisors have improved the technique, and it has now reached a high degree of perfection. So much has been learnt that there would seem to be few obstacles to be overcome in extending such undertakings to transplantations to the Dogger Bank where all nations could participate in the benefits. Dr. Blegvad points out that even in the Belt Seas there is a need for the protection of the just transplanted fish — this would certainly also be necessary in large scale Dogger Bank transplantations. In the reviewer's opinion this could be done if all nations fishing the North Sea shared in the expense of the work. It would then be to the advantage of everyone to make it a commercial success and all could agree to have a closed season on the Dogger during the time that the fish were put out and for a definite period afterwards. There is always the difficulty of assessing the share to be paid by each nation, but this could be overcome by marking a number of fish at the time of transplantation and proportionating the cost to the number of returns by each nation of the marked fish.

Everyone who is interested in the North Sea plaice stock, both scientific workers and the men who gain their livelihood by fishing, should read this report, since it shows that man can indeed farm the seas and redress the balance of nature which he has done so much to destroy.

*D. E. T.-P.*

**M. Graham.** "Investigations of the Herring of Passamaquoddy and Adjacent-Regions." Journ. Biol. Board Canada. Vol. II, No. 2, pp. 95—140, 16 Fig. Toronto, 1936.

This paper is the result of an investigation into the probable effects on the "sardine" herring fishery in the Passamaquoddy and adjacent regions of the building of power dams across the mouth of Passamaquoddy and Cobscook Bays.

An outline is given of the fishery which is carried on mainly by weirs. The notable differences in the yields of closely adjacent weirs are discussed
